# Supplementary material
Source: PubMed Central journal article supplement (PMC5685236)
Supplement: 2017_167254-Disclosures_and_Contributions.pdf [file 2017_167254-Disclosures_and_Contributions.pdf]

Haematologica  
HAEMATOL/2017/167254  
Version 2

Combining flow cytometry and WT1 assessment improves the prognostic value of pre-transplant minimal residual disease in acute myeloid leukemia

Fabio Guolo, Paola Minetto, Marino Clavio, Maurizio Miglino, Federica Galaverna, Anna Maria Raiola, Carmen Di Grazia, Nicoletta Colombo, Sarah Pozzi, Adalberto Ibatici, Samuele Bagnasco, Daniela Guardo, Annalisa Kunkl, Filippo Ballerini, Chiara Ghiggi, Roberto M. Lemoli, Marco Gobbi, and Andrea Bacigalupo

Disclosures: This work was partially supported by IRCCS Azienda Ospedaliera Universitaria San Martino - IST Istituto Nazionale per la Ricerca sul Cancro, 5 per 1000 per la Ricerca Corrente.

Contributions: FGu designed research SB, FGa and FGu collected data MC, FGu, AI, MM and PM analyzed and interpreted data FGu and PM performed statistical analysis MC, FGu, RML and PM wrote the manuscript NC and SP performed all the molecular analyses MM supervised and reviewed molecular analysis data AK performed multicolor flow cytometry analyses FB and CG reviewed pharmacological data CDG and AMR reviewed allogeneic stem cell transplantation data FGa and DG reviewed the manuscript AB coordinated the study and reviewed the manuscript AB, MG and RML reviewed the final version of the manuscript
